# Supplementary material for: Precise aggregation-induced emission enhancement via H+ sensing and its use in ratiometric detection of intracellular pH values
Source: Royal Society of Chemistry journal article supplement (doi:10.1039/c4ra10511g), 2014-01-01

## Supporting Information

### Precise aggregation-induced emission enhancement *via* H<sup>+</sup> sensing and its use in ratiometric detection of intracellular pH values

Anushri Rananaware,<sup>a</sup> Rajesh S. Bhosale,<sup>b,c</sup> Hemlata Patil,<sup>a</sup> Mohammad Al Kobaisi,<sup>d</sup>  
Amanda Abraham<sup>a</sup>, Ravi Shukla,<sup>a</sup> Sidhanath V. Bhosale,<sup>b</sup> Sheshanath V. Bhosale<sup>a,\*</sup>

<sup>a</sup> School of Applied Sciences, RMIT University, GPO Box 2476, Melbourne, Vic. 3001, Australia.

<sup>b</sup> Polymers and Functional Materials Division, CSIR-Indian Institute of Chemical Technology, Hyderabad-500 007, Telangana, India

<sup>c</sup> RMIT-IICT Research Centre, CSIR-Indian Institute of Chemical Technology, Hyderabad-500 007, Telangana, India

<sup>d</sup> Faculty of *Science, Engineering* and Technology, Swinburne University, PO BOX 3122, Hawthorn, Australia

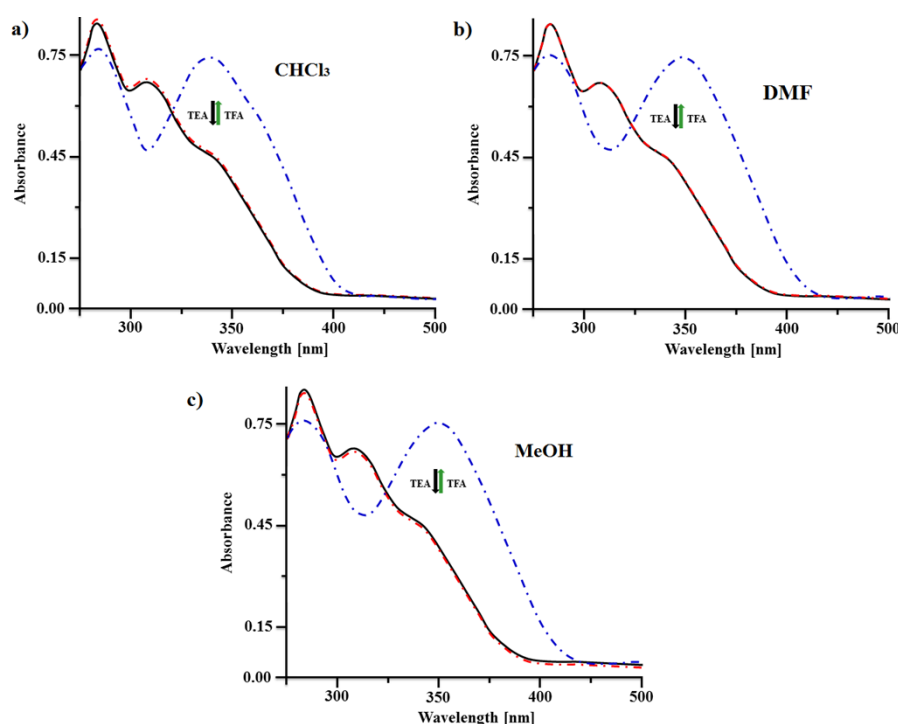

**Fig. S1** UV-vis absorption spectral changes of Py-TPE **1** ( $1 \times 10^{-5}$  M): with and without addition of 0-10 equiv. TFA ( $10^{-4}$  M) in in CHCl<sub>3</sub>, DMF, and MeOH, respectively, and upon addition of TEA absorption restored to its original position identical to Py-TPE **1**.

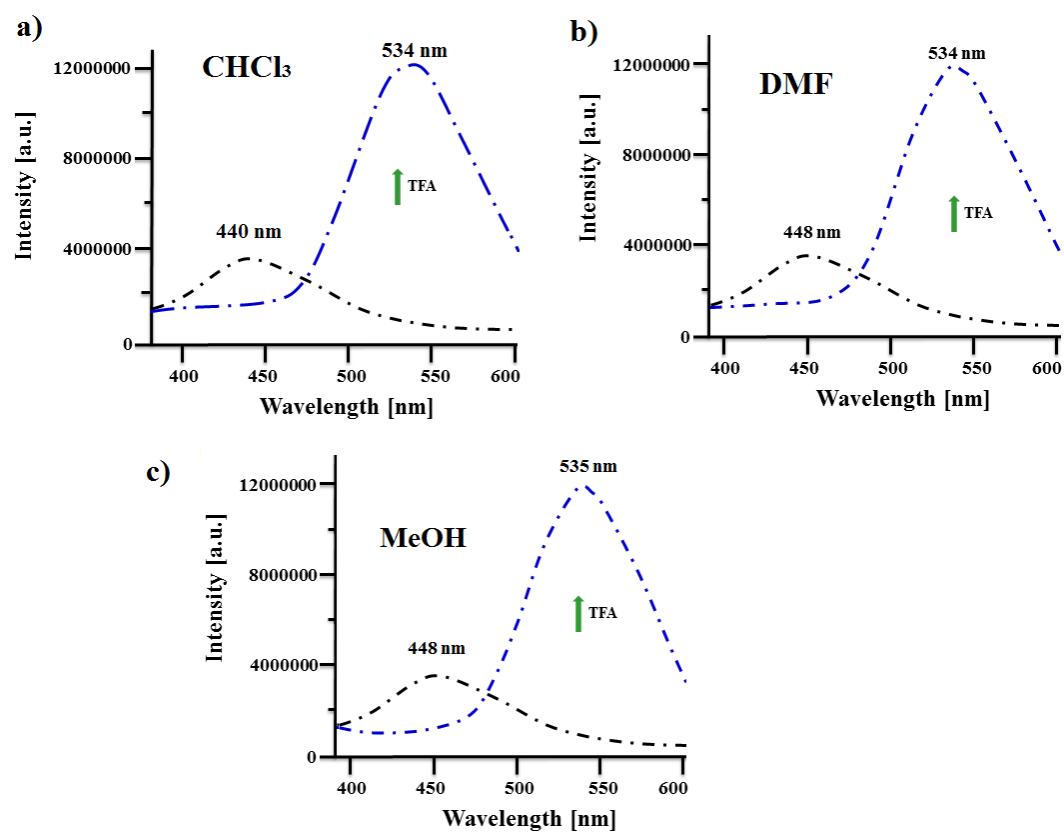

**Fig. S2** Fluorescence emission spectra of **1** ( $1 \times 10^{-5}$  M): with and without addition of 10 equiv. of TFA ( $10^{-4}$  M) in CHCl<sub>3</sub>, DMF and MeOH, respectively.

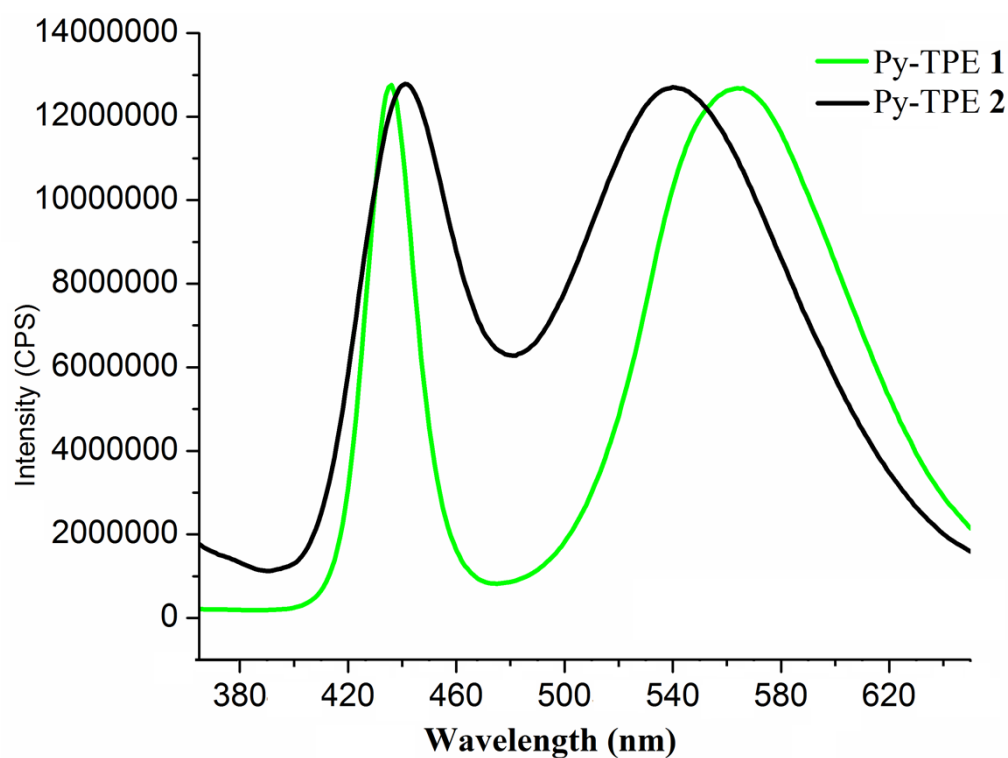

**Fig. S3** Fluorescence emission spectra ( $\lambda_{\text{ex}} = 365$  nm) of **1** and **2** in solid state with and without protonation, respectively.

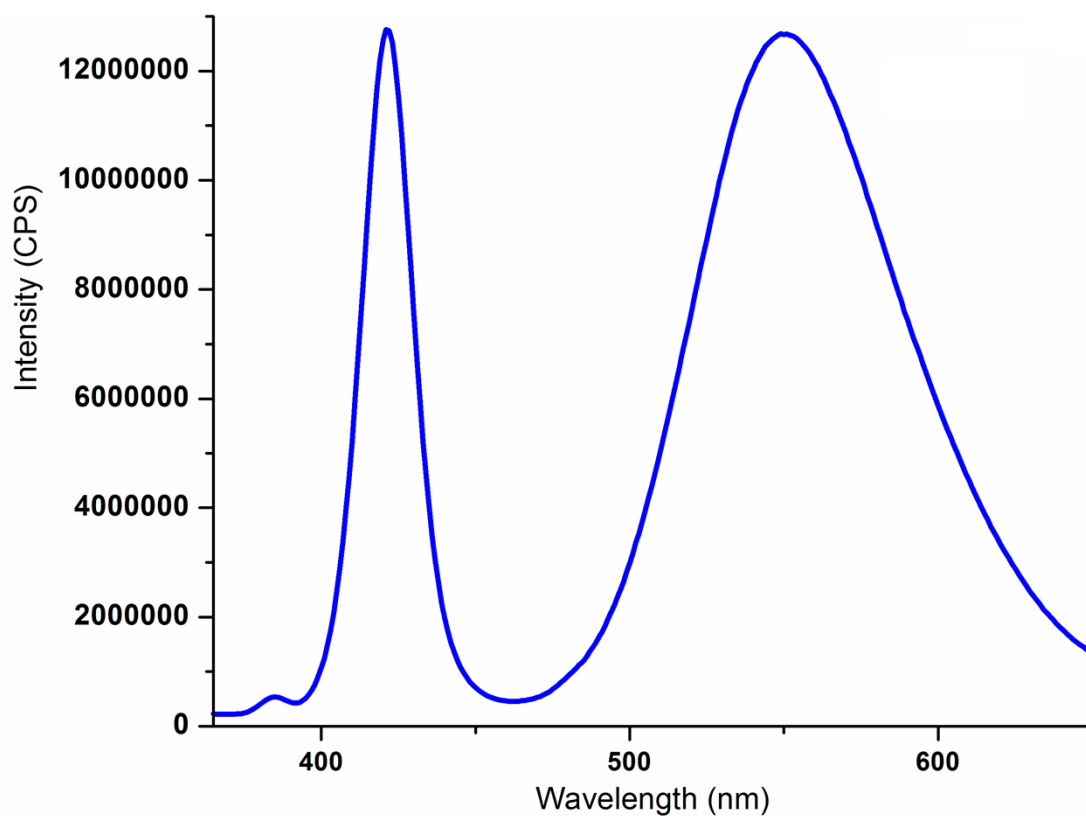

**Fig. S4** Fluorescence emission spectra ( $\lambda_{\text{ex}} = 365 \text{ nm}$ ) of **1** in water without protonation.

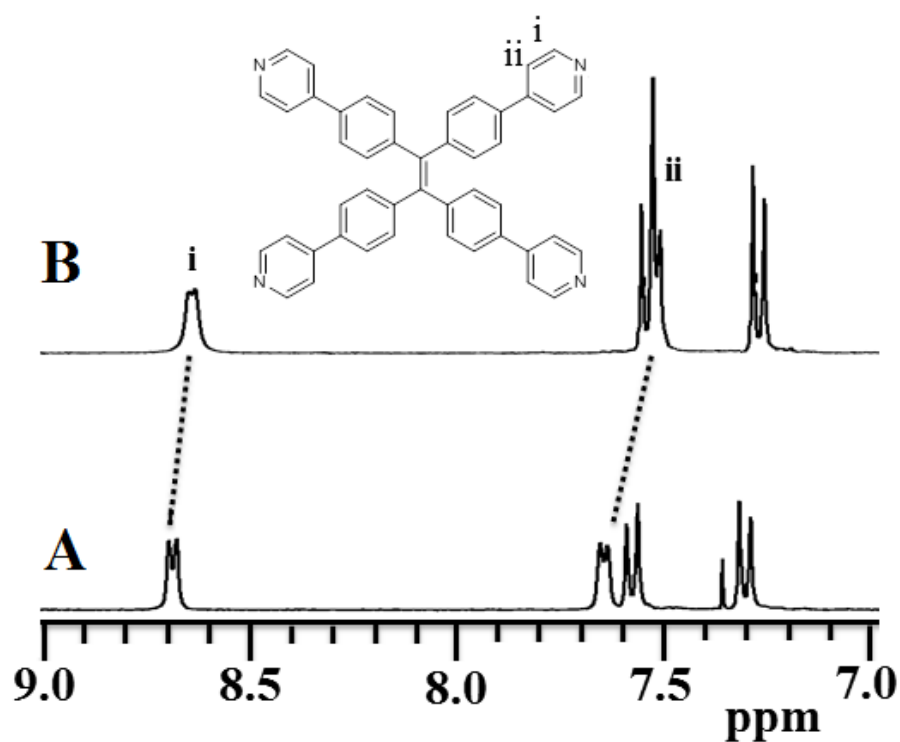

**Fig. S5** Partial  $^1\text{H}$  NMR spectra of Py-TPE **1** with TFA (A) and without TFA (B).

Unprotonated

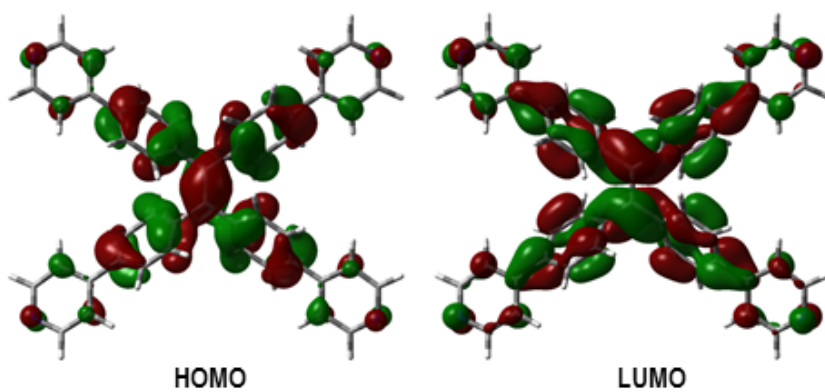

Protonated

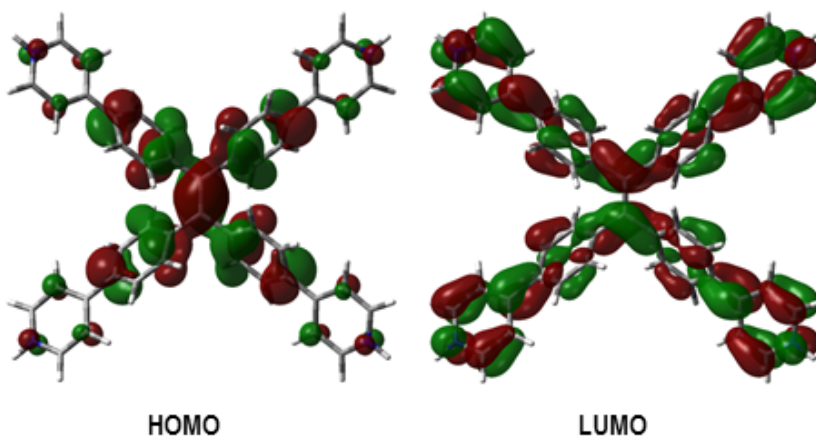

**Fig. S6** Orbital density distribution for the HOMOs and LUMOs of Py-TPE **1** (upper) and Py-TPE **2** (lower). Density functional theory calculations were performed on **1** and **2** using the Gaussian 09 suite of programs and B3LYP/6-31G level of theory.

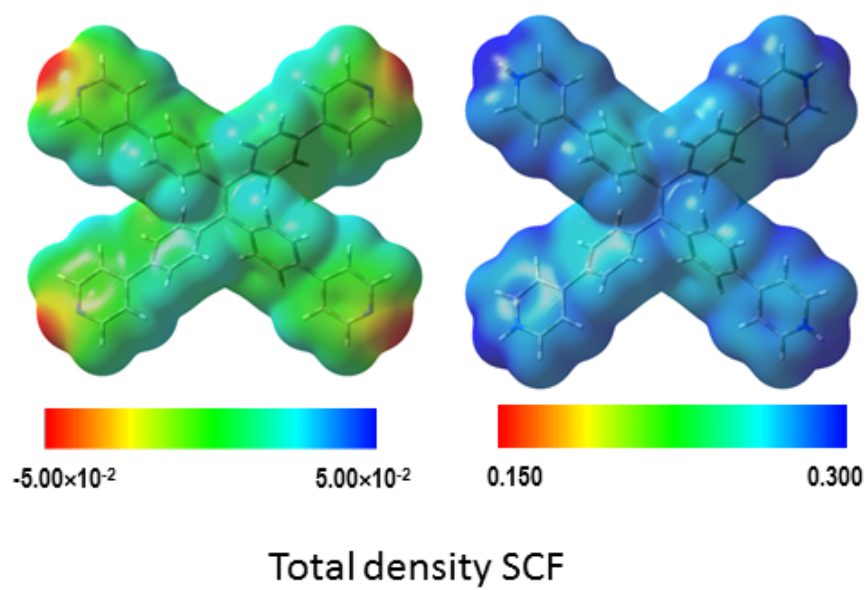

Fig. S7 Total density SCF

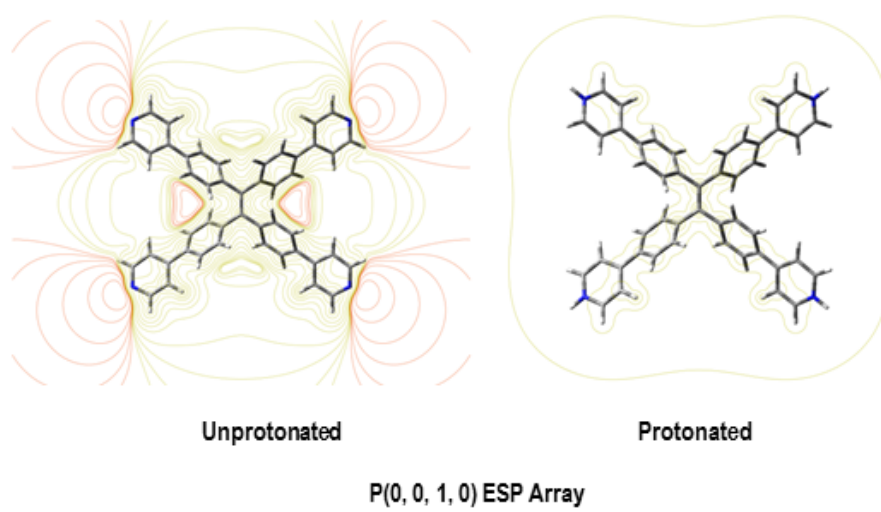

Fig. S8 ESP Array P (0, 0, 1, 0)

**Table S1.** Comparative DFT calculation of **1** and **2**

|                                 | <b>Unprotonated</b> | <b>Protonated</b> |
|---------------------------------|---------------------|-------------------|
| <b>Calculation Type</b>         | FOPT                | FOPT              |
| <b>Calculation Method</b>       | RB3LYP              | RB3LYP            |
| <b>Basis Set</b>                | 6-31G               | 6-31G             |
| <b>Charge</b>                   | 0                   | +4                |
| <b>Spin</b>                     | Singlet             | Singlet           |
| <b>Total Energy (a.u.)</b>      | -1990.67974909      | -1991.97389922    |
| <b>RMS Gradient Norm (a.u.)</b> | 0.00000371          | 0.00000096        |
| <b>Dipole Moment (Debye)</b>    | 0.0001              | 0.0013            |
| <b>HOMO (Hartree)</b>           | -0.21228            | -0.50574          |
| <b>LUMO (Hartree)</b>           | -0.07954            | -0.39475          |
| <b>HOMO-LUMO gap (Hartree)</b>  | 0.13274             | 0.11099           |
| <b>HOMO-LUMO gap (eV)</b>       | 3.612041            | 3.020193          |
| <b>HOMO-LUMO gap (nm)</b>       | 343.2525            | 410.5175          |

**Table S2.** TD-DFT calculation of **1** excited states

| g→e            | Contribution to the CI wave function | Transition energy     | Oscillator strength f | S <sup>2</sup> |
|----------------|--------------------------------------|-----------------------|-----------------------|----------------|
| <sup>3</sup> A |                                      | 2.2141 eV (559.96 nm) | 0.0000                | 2.000          |
| 152→169        | 0.1029                               |                       |                       |                |
| 168→169        | 0.65307                              |                       |                       |                |
| 168→175        | 0.14298                              |                       |                       |                |
| <sup>3</sup> A |                                      | 3.0417 eV (407.62 nm) | 0.0000                | 2.000          |
| 161→170        | -0.1895                              |                       |                       |                |
| 162→172        | 0.16955                              |                       |                       |                |
| 163→169        | 0.24388                              |                       |                       |                |
| 167→169        | 0.2439                               |                       |                       |                |
| 168→171        | 0.47461                              |                       |                       |                |
| 168→183        | 0.1021                               |                       |                       |                |
| <sup>3</sup> A |                                      | 3.0437 eV (407.35 nm) | 0.0000                | 2.000          |
| 161→171        | -0.20068                             |                       |                       |                |
| 162→169        | 0.29089                              |                       |                       |                |
| 163→172        | 0.12825                              |                       |                       |                |
| 167→172        | 0.1266                               |                       |                       |                |
| 168→170        | 0.50558                              |                       |                       |                |
| 168→182        | -0.10455                             |                       |                       |                |
| <sup>1</sup> A |                                      | 3.1957 eV (387.97 nm) | 0.6433                | 0.000          |
| 168→169        | 0.70544                              |                       |                       |                |
| <sup>3</sup> A |                                      | 3.2007 eV (387.37 nm) | 0.0000                | 2.000          |
| 152→172        | -0.10399                             |                       |                       |                |
| 161→169        | -0.3365                              |                       |                       |                |
| 162→171        | 0.25883                              |                       |                       |                |
| 163→170        | 0.20219                              |                       |                       |                |
| 167→170        | 0.20219                              |                       |                       |                |
| 168→172        | 0.34963                              |                       |                       |                |
| 168→184        | 0.10537                              |                       |                       |                |
| <sup>1</sup> A |                                      | 3.6117 eV (343.28 nm) | 0.4656                | 0.000          |
| 162→169        | -0.10298                             |                       |                       |                |
| 168→170        | 0.69526                              |                       |                       |                |
| <sup>1</sup> A |                                      | 3.7570 eV (330.01 nm) | 0.0087                | 0.000          |
| 168→171        | 0.70102                              |                       |                       |                |
| <sup>1</sup> A |                                      | 3.7765 eV (328.30 nm) | 0.0203                | 0.000          |
| 163→169        | 0.25784                              |                       |                       |                |
| 167→169        | 0.62166                              |                       |                       |                |
| 168→173        | -0.11489                             |                       |                       |                |

**Table S3.** TD-DFT calculation of **2** excited states

| g→e                                                 | Contribution to the CI wave function                 | Transition energy     | Oscillator strength f | S <sup>2</sup> |
|-----------------------------------------------------|------------------------------------------------------|-----------------------|-----------------------|----------------|
| <sup>3</sup> A                                      |                                                      | 2.0480 eV (605.39 nm) | 0.0000                | 2.000          |
| 168→169<br>168→177                                  | 0.63398<br>-0.22748                                  |                       |                       |                |
| <sup>3</sup> A                                      |                                                      | 2.4831 eV (499.32 nm) | 0.0000                | 2.000          |
| 161→171<br>164→172<br>167→169<br>168→170            | 0.11319<br>0.10842<br>-0.17346<br>0.63626            |                       |                       |                |
| <sup>3</sup> A                                      |                                                      | 2.4893 eV (498.07 nm) | 0.0000                | 2.000          |
| 161→170<br>164→169<br>167→172<br>168→171            | 0.10958<br>-0.15956<br>0.11425<br>0.64099            |                       |                       |                |
| <sup>1</sup> A                                      |                                                      | 2.6669 eV (464.91 nm) | 0.6337                | 0.000          |
| 168→169                                             | 0.70652                                              |                       |                       |                |
| <sup>3</sup> A                                      |                                                      | 2.6740 eV (463.67 nm) | 0.0000                | 2.000          |
| 161→169<br>164→170<br>166→169<br>167→171<br>168→172 | -0.15258<br>0.17178<br>-0.1488<br>0.18574<br>0.59572 |                       |                       |                |
| <sup>1</sup> A                                      |                                                      | 2.8111 eV (441.05 nm) | 0.0238                | 0.000          |
| 168→170                                             | 0.70571                                              |                       |                       |                |
| <sup>1</sup> A                                      |                                                      | 2.8275 eV (438.50 nm) | 0.5382                | 0.000          |
| 168→171                                             | 0.70486                                              |                       |                       |                |
| <sup>1</sup> A                                      |                                                      | 3.0830 eV (402.16 nm) | 0.0000                | 0.000          |
| 168→172                                             | 0.6964                                               |                       |                       |                |

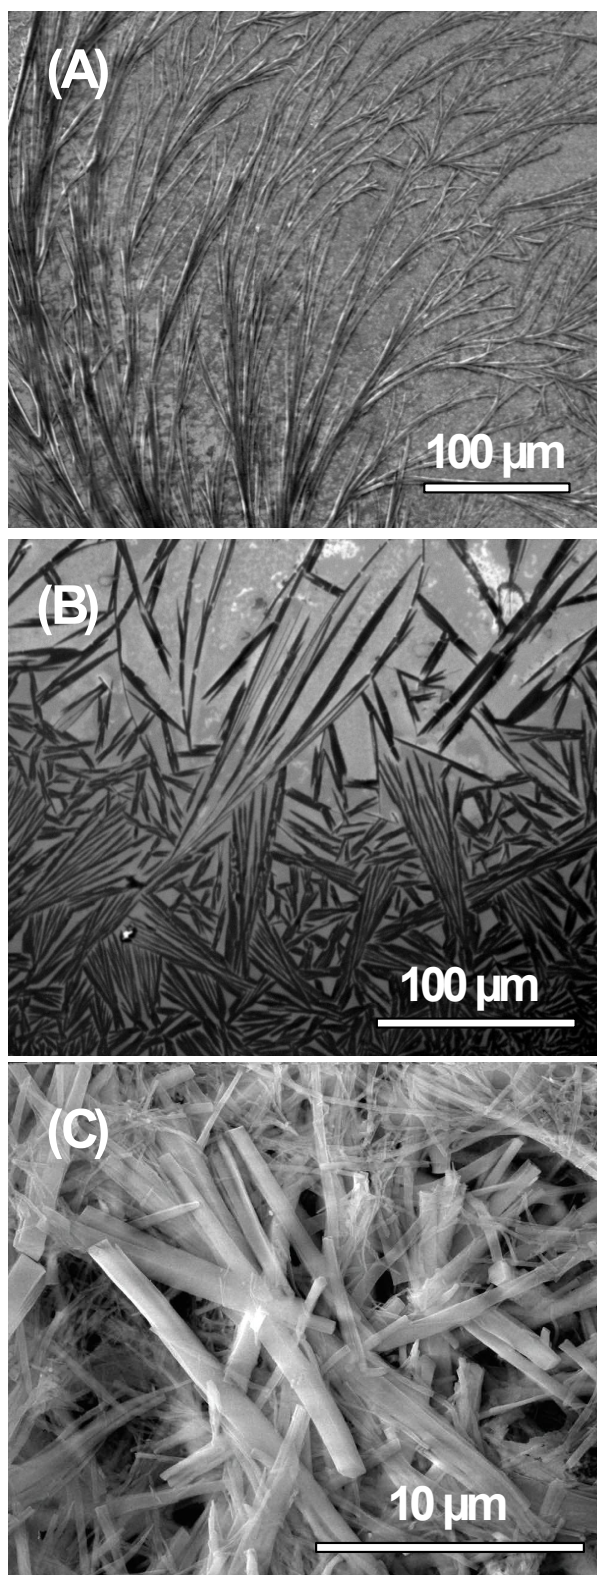

**Fig. S9** Scanning electron micrographs of recrystallized **2** ( $10^{-4}$  M) fractal formed by solvent evaporation from (A) DMF, (B) MeOH and (C)  $\text{CHCl}_3$  solutions.



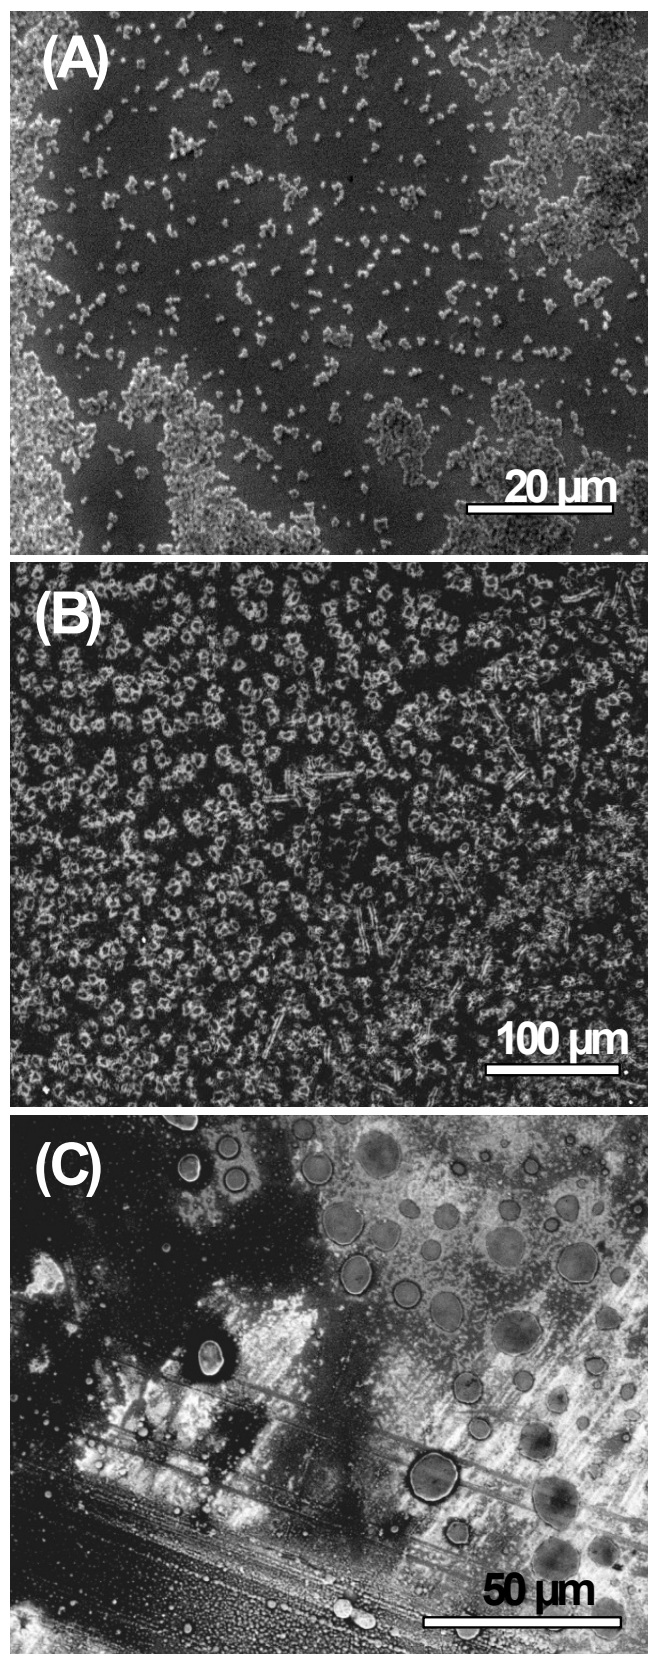

**Fig. S10** Scanning electron micrographs of **1** ( $10^{-5}$  M) after solvent evaporation from: (A) MeOH, (B) DMF, and (C)  $\text{CHCl}_3$  solutions, forming non-crystalline global supramolecular aggregates.

## Materials & Methods for living cells

RPMI media, foetal bovine serum, phosphate buffered saline (PBS) and penicillin-streptomycin were obtained from Life Technologies (USA) and dimethyl sulfoxide (DMSO) was obtained from Sigma-Aldrich (USA). A stock solution of 500 $\mu$ g/mL of the dye was prepared in DMSO and used for all cell culture experiments.

Prostate cancer (PC-3) cells were maintained in RPMI media with 10% foetal bovine serum, 100U/mL penicillin and 100U/mL streptomycin, at 37°C and 5% CO<sub>2</sub>. 2 x 10<sup>5</sup> cells were seeded into 24 well plates for 24 hours, after which cells were treated with 5 $\mu$ g/mL dye for 2 hours. Cells were washed with cold to remove unreacted dye. The fluorescence staining of the dye was exposing cells to in acidic (pH3), neutral (pH 7) and alkaline (pH9) environments, and fluorescence of the cells was observed using a Nikon Eclipse TS100 microscope fitted with mercury lamp.

### <sup>1</sup>H NMR of Py-TPE 1

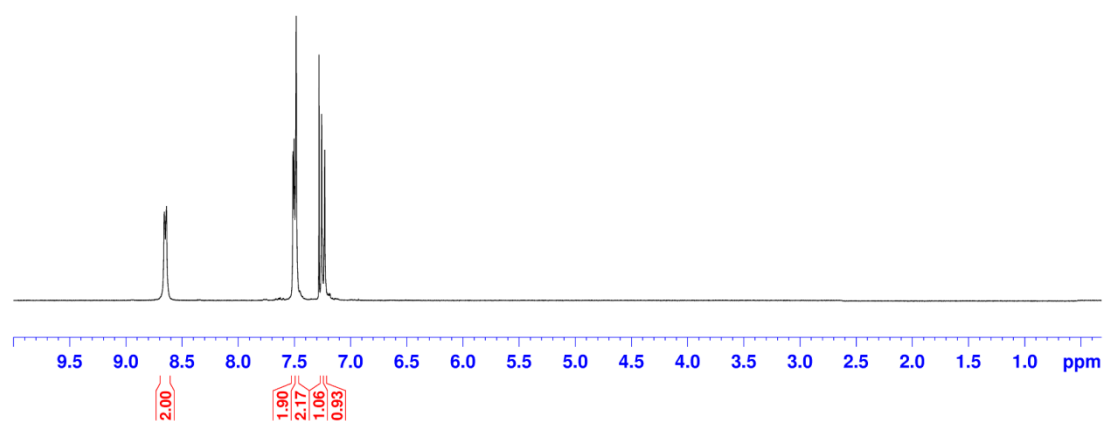

### <sup>13</sup>C NMR of Py-TPE 1

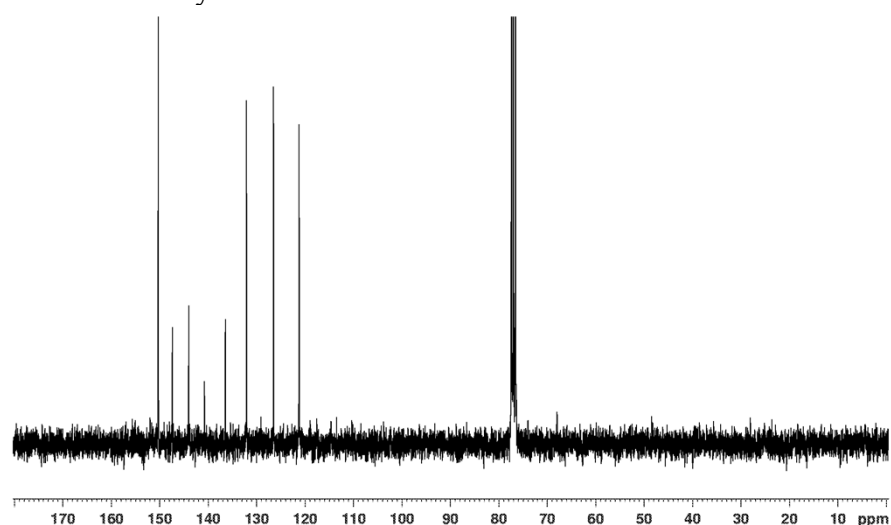

Supplement: c4ra10511g1.pdf [file c4ra10511g1.pdf]
